# Supplementary material for: Investigating Shared Genetic Bases between Psychiatric Disorders, Cardiometabolic and Sleep Traits Using K-Means Clustering and Local Genetic Correlation Analysis
Source: MDPI journal article supplement (doi:10.3390/a15110409), 2022-11-03
Supplement: s1 [file s1]

**Table S1.** GWAS datasets included in the analyses

| <b>Trait</b>   | <b>Sample size</b>                                                                                                                                                                     | <b>Reference</b> |
|----------------|----------------------------------------------------------------------------------------------------------------------------------------------------------------------------------------|------------------|
| BD             | 41,917 cases from 57 cohorts collected in Europe, North America and Australia and 371,549 controls of European origin                                                                  | [5]              |
| SCZ            | 53,386 cases and 77,258 controls of European origin                                                                                                                                    | [6]              |
| MDD            | 170,756 cases and 329,443 controls from PGC and the UK Biobank                                                                                                                         | [7]              |
| ADHD           | 20,183 cases and 35,191 controls from 12 cohorts (including the iPSYCH population-based cohort from Denmark and 11 European, North American and Chinese cohorts aggregated by the PGC) | [23]             |
| ASD            | 18,381 cases and 27,969 controls from the iPSYCH cohort and five family-based trio samples of European ancestry from the PGC                                                           | [24]             |
| PTSD           | 23,212 cases and 151,447 controls of European origin                                                                                                                                   | [25]             |
| OCD            | 2,688 cases and 7,037 controls of European origin                                                                                                                                      | [26]             |
| TS             | 4,819 cases and 9,488 controls                                                                                                                                                         | [27]             |
| AN             | 16,992 cases and 55,525 controls of European origin                                                                                                                                    | [28]             |
| BMI            | 806,834 individuals from the UK Biobank and the GIANT consortium                                                                                                                       | [29]             |
| T2D            | 55,193 and 74,132 controls of European origin                                                                                                                                          | [30]             |
| CRP            | 575,531 individuals of European origin from the UK Biobank and the CHARGE Consortium                                                                                                   | [32]             |
| CAD            | 122,733 cases and 424,528 controls of European ancestry from the UK Biobank and CARDIoGRAMplusC4D                                                                                      | [31]             |
| Chronotype     | 449,734 individuals from the UK Biobank                                                                                                                                                | [34]             |
| Insomnia       | 109,548 cases and 277,440 controls from the UK Biobank                                                                                                                                 | [33]             |
| Sleep duration | 446,118 individuals from the UK Biobank                                                                                                                                                | [35]             |

The table shows the phenotypes analyzed in this study, the original GWAS datasets from which summary statistics were obtained and relative references. In the case of studies including data from 23andMe, we used the publicly available version of genome-wide summary statistics that exclude data for 23andMe participants (as 23andMe policies only allow the publication of summary statistics including up to 10,000 variants).

Abbreviations: ADHD, attention deficit/hyperactivity disorder; AN, anorexia nervosa; ASD, autism spectrum disorders; BD, bipolar disorder; BMI, body mass index; CAD, coronary artery disease; CRP, C-reactive protein; MDD, major depressive disorder; OCD, obsessive-compulsive disorder; SCZ, schizophrenia; se, standard error; PTSD, post-traumatic stress disorder; T2D, type 2 diabetes.

**Table S2.** Complete table of genetic correlations between psychiatric and metabolic or sleep traits, significant after multiple testing adjustment based on the number of tests (n = 120)

| Trait 1 | Trait 2        | $r_g$ | se   | Z      | p                      | adj p                  |
|---------|----------------|-------|------|--------|------------------------|------------------------|
| BD      | SCZ            | 0.70  | 0.02 | 46.12  | 0.0e+00                | 0.0e+00                |
| BD      | MDD            | 0.45  | 0.02 | 20.64  | $1.2 \times 10^{-94}$  | $1.4 \times 10^{-92}$  |
| BD      | ADHD           | 0.22  | 0.03 | 6.63   | $3.3 \times 10^{-11}$  | $3.9 \times 10^{-9}$   |
| BD      | OCD            | 0.32  | 0.06 | 5.77   | $8.1 \times 10^{-9}$   | $9.7 \times 10^{-7}$   |
| BD      | PTSD           | 0.38  | 0.05 | 7.17   | $7.8 \times 10^{-13}$  | $9.3 \times 10^{-11}$  |
| BD      | ASD            | 0.22  | 0.04 | 5.43   | $5.7 \times 10^{-8}$   | $6.9 \times 10^{-6}$   |
| BD      | AN             | 0.22  | 0.03 | 7.71   | $1.2 \times 10^{-14}$  | $1.5 \times 10^{-12}$  |
| BD      | Insomnia       | 0.11  | 0.03 | 4.23   | $2.4 \times 10^{-5}$   | 0.0028                 |
| BD      | Sleep duration | 0.11  | 0.02 | 4.91   | $9.0 \times 10^{-7}$   | 0.0001                 |
| SCZ     | MDD            | 0.34  | 0.02 | 16.85  | $1.1 \times 10^{-63}$  | $1.3 \times 10^{-61}$  |
| SCZ     | CRP            | -0.06 | 0.02 | -3.75  | 0.0002                 | 0.0211                 |
| SCZ     | BMI            | -0.10 | 0.01 | -7.07  | $1.6 \times 10^{-12}$  | $1.9 \times 10^{-10}$  |
| SCZ     | ADHD           | 0.18  | 0.03 | 5.98   | $2.3 \times 10^{-9}$   | $2.7 \times 10^{-7}$   |
| SCZ     | OCD            | 0.32  | 0.05 | 6.37   | $1.9 \times 10^{-10}$  | $2.3 \times 10^{-8}$   |
| SCZ     | PTSD           | 0.31  | 0.05 | 6.45   | $1.2 \times 10^{-10}$  | $1.4 \times 10^{-8}$   |
| SCZ     | ASD            | 0.26  | 0.03 | 7.48   | $7.5 \times 10^{-14}$  | $9.0 \times 10^{-12}$  |
| SCZ     | AN             | 0.23  | 0.03 | 8.59   | $9.0 \times 10^{-18}$  | $1.1 \times 10^{-15}$  |
| SCZ     | Chronotype     | -0.10 | 0.02 | -5.38  | $7.6 \times 10^{-8}$   | $9.1 \times 10^{-6}$   |
| SCZ     | Sleep duration | 0.15  | 0.02 | 7.37   | $1.7 \times 10^{-13}$  | $2.1 \times 10^{-11}$  |
| MDD     | CRP            | 0.11  | 0.02 | 5.50   | $3.8 \times 10^{-8}$   | $4.6 \times 10^{-6}$   |
| MDD     | BMI            | 0.11  | 0.02 | 6.55   | $5.6 \times 10^{-11}$  | $6.8 \times 10^{-9}$   |
| MDD     | T2D            | 0.14  | 0.02 | 6.58   | $4.8 \times 10^{-11}$  | $5.8 \times 10^{-9}$   |
| MDD     | ADHD           | 0.46  | 0.03 | 15.66  | $2.9 \times 10^{-55}$  | $3.5 \times 10^{-53}$  |
| MDD     | OCD            | 0.24  | 0.05 | 4.78   | $1.8 \times 10^{-6}$   | 0.0002                 |
| MDD     | PTSD           | 0.72  | 0.07 | 10.71  | $9.4 \times 10^{-27}$  | $1.1 \times 10^{-24}$  |
| MDD     | TS             | 0.23  | 0.04 | 5.48   | $4.3 \times 10^{-8}$   | $5.1 \times 10^{-6}$   |
| MDD     | ASD            | 0.37  | 0.03 | 12.66  | $9.3 \times 10^{-37}$  | $1.1 \times 10^{-34}$  |
| MDD     | AN             | 0.27  | 0.03 | 8.31   | $9.2 \times 10^{-17}$  | $1.1 \times 10^{-14}$  |
| MDD     | Insomnia       | 0.44  | 0.03 | 17.60  | $2.3 \times 10^{-69}$  | $2.8 \times 10^{-67}$  |
| MDD     | Sleep duration | -0.11 | 0.02 | -4.43  | $9.4 \times 10^{-6}$   | 0.0011                 |
| MDD     | CAD            | 0.21  | 0.02 | 10.33  | $5.1 \times 10^{-25}$  | $6.2 \times 10^{-23}$  |
| CRP     | BMI            | 0.52  | 0.04 | 14.28  | $3.1 \times 10^{-46}$  | $3.7 \times 10^{-44}$  |
| CRP     | T2D            | 0.40  | 0.04 | 10.73  | $7.7 \times 10^{-27}$  | $9.2 \times 10^{-25}$  |
| CRP     | ADHD           | 0.30  | 0.04 | 8.27   | $1.4 \times 10^{-16}$  | $1.6 \times 10^{-14}$  |
| CRP     | OCD            | -0.22 | 0.04 | -5.39  | $6.9 \times 10^{-8}$   | $8.3 \times 10^{-6}$   |
| CRP     | PTSD           | 0.21  | 0.04 | 4.98   | $6.5 \times 10^{-7}$   | $7.7 \times 10^{-5}$   |
| CRP     | AN             | -0.28 | 0.03 | -9.28  | $1.7 \times 10^{-20}$  | $2.1 \times 10^{-18}$  |
| CRP     | Insomnia       | 0.16  | 0.02 | 6.97   | $3.2 \times 10^{-12}$  | $3.8 \times 10^{-10}$  |
| CRP     | CAD            | 0.27  | 0.03 | 7.77   | $7.8 \times 10^{-15}$  | $9.3 \times 10^{-13}$  |
| BMI     | T2D            | 0.55  | 0.02 | 25.26  | $8.9 \times 10^{-141}$ | $1.1 \times 10^{-138}$ |
| BMI     | ADHD           | 0.35  | 0.02 | 14.65  | $1.4 \times 10^{-48}$  | $1.7 \times 10^{-46}$  |
| BMI     | OCD            | -0.29 | 0.04 | -6.97  | $3.2 \times 10^{-12}$  | $3.8 \times 10^{-10}$  |
| BMI     | PTSD           | 0.32  | 0.04 | 7.77   | $8.1 \times 10^{-15}$  | $9.7 \times 10^{-13}$  |
| BMI     | AN             | -0.31 | 0.02 | -13.52 | $1.3 \times 10^{-41}$  | $1.5 \times 10^{-39}$  |
| BMI     | Insomnia       | 0.19  | 0.02 | 8.98   | $2.8 \times 10^{-19}$  | $3.3 \times 10^{-17}$  |

|                |                |       |      |        |                       |                       |
|----------------|----------------|-------|------|--------|-----------------------|-----------------------|
| BMI            | Sleep duration | -0.09 | 0.02 | -4.43  | $9.4 \times 10^{-6}$  | 0.0011                |
| BMI            | CAD            | 0.31  | 0.02 | 15.00  | $6.9 \times 10^{-51}$ | $8.3 \times 10^{-49}$ |
| T2D            | ADHD           | 0.32  | 0.03 | 12.16  | $5.0 \times 10^{-34}$ | $6.0 \times 10^{-32}$ |
| T2D            | OCD            | -0.17 | 0.04 | -3.81  | 0.0001                | 0.0164                |
| T2D            | PTSD           | 0.25  | 0.05 | 5.21   | $1.9 \times 10^{-7}$  | $2.2 \times 10^{-5}$  |
| T2D            | AN             | -0.20 | 0.03 | -7.37  | $1.8 \times 10^{-13}$ | $2.1 \times 10^{-11}$ |
| T2D            | Insomnia       | 0.21  | 0.03 | 8.09   | $5.9 \times 10^{-16}$ | $7.0 \times 10^{-14}$ |
| T2D            | Chronotype     | 0.07  | 0.02 | 3.71   | 0.0002                | 0.0248                |
| T2D            | CAD            | 0.41  | 0.02 | 18.69  | $6.3 \times 10^{-78}$ | $7.6 \times 10^{-76}$ |
| ADHD           | PTSD           | 0.66  | 0.09 | 7.47   | $8.1 \times 10^{-14}$ | $9.7 \times 10^{-12}$ |
| ADHD           | TS             | 0.22  | 0.06 | 3.99   | $6.5 \times 10^{-5}$  | 0.0078                |
| ADHD           | ASD            | 0.37  | 0.05 | 7.86   | $3.9 \times 10^{-15}$ | $4.7 \times 10^{-13}$ |
| ADHD           | Insomnia       | 0.37  | 0.03 | 10.67  | $1.4 \times 10^{-26}$ | $1.7 \times 10^{-24}$ |
| ADHD           | CAD            | 0.27  | 0.03 | 9.86   | $5.9 \times 10^{-23}$ | $7.1 \times 10^{-21}$ |
| OCD            | TS             | 0.51  | 0.09 | 5.53   | $3.1 \times 10^{-8}$  | $3.8 \times 10^{-6}$  |
| OCD            | AN             | 0.45  | 0.08 | 5.82   | $5.8 \times 10^{-9}$  | $6.9 \times 10^{-7}$  |
| PTSD           | ASD            | 0.35  | 0.08 | 4.46   | $8.3 \times 10^{-6}$  | 0.0010                |
| PTSD           | Insomnia       | 0.48  | 0.07 | 7.33   | $2.3 \times 10^{-13}$ | $2.7 \times 10^{-11}$ |
| PTSD           | Sleep duration | -0.23 | 0.06 | -3.86  | 0.0001                | 0.0133                |
| PTSD           | CAD            | 0.30  | 0.05 | 6.06   | $1.4 \times 10^{-9}$  | $1.7 \times 10^{-7}$  |
| ASD            | AN             | 0.19  | 0.05 | 3.74   | 0.0002                | 0.0219                |
| ASD            | Chronotype     | -0.18 | 0.03 | -5.45  | $5.1 \times 10^{-8}$  | $6.1 \times 10^{-6}$  |
| AN             | Sleep duration | -0.12 | 0.03 | -3.83  | 0.0001                | 0.0152                |
| Insomnia       | Sleep duration | -0.47 | 0.02 | -20.45 | $6.3 \times 10^{-93}$ | $7.5 \times 10^{-91}$ |
| Insomnia       | CAD            | 0.26  | 0.03 | 10.11  | $4.8 \times 10^{-24}$ | $5.8 \times 10^{-22}$ |
| Sleep duration | CAD            | -0.09 | 0.02 | -3.88  | 0.0001                | 0.0127                |

Abbreviations: ADHD, attention deficit/hyperactivity disorder; AN, anorexia nervosa; ASD, autism spectrum disorders; BD, bipolar disorder; BMI, body mass index; CAD, coronary artery disease; CRP, C-reactive protein; MDD, major depressive disorder; OCD, obsessive-compulsive disorder; SCZ, schizophrenia; se, standard error; PTSD, post-traumatic stress disorder; T2D, type 2 diabetes. The adj p column reports p-values adjusted according to Bonferroni based on the number of conducted tests (n = 120).

**Table S3.** Selection of insomnia and MDD instrumental variables

|                                                                                                                                                        | <b>Number of potential IVs to estimate the causal effects of MDD on insomnia</b> | <b>Number of potential IVs to estimate the causal effects of insomnia on MDD</b> |
|--------------------------------------------------------------------------------------------------------------------------------------------------------|----------------------------------------------------------------------------------|----------------------------------------------------------------------------------|
| Number of SNPs included in the publicly available summary statistics                                                                                   | 8,483,301 [7]                                                                    | 12,663,596 [33]                                                                  |
| Number of SNPs significant at a genome-wide threshold ( $p < 5 \times 10^{-8}$ )                                                                       | 4,625                                                                            | 528                                                                              |
| Number of SNPs after clumping done with the TwoSampleMR package                                                                                        | 50                                                                               | 13                                                                               |
| Number of SNPs after removal of palindromic SNPs with intermediate allele frequencies during data harmonization conducted with the TwoSampleMR package | 39                                                                               | 12                                                                               |

The table shows the number of SNPs available in the original datasets, together with relative references, and the process of selection of candidate instrumental variables (IV). For both studies, we used the publicly available version of genome-wide summary statistics that exclude data for 23andMe participants.

First, variants associated with MDD (left column) or insomnia (right column) at a genome-wide significant threshold ( $p < 5 \times 10^{-8}$ ) were selected. Next, to select independent SNPs, clumping was conducted with the TwoSampleMR package, using European data from the IEU GWAS database as reference, with default parameters ( $r^2 > 0.001$  in the range of 10,000 Mb). At this step, the SNP with the lowest p-value was retained. Finally, data harmonization procedures implemented in the TwoSample MR package included removal of palindromic SNPs with intermediate allele frequencies. After these steps, 39 IVs for MDD and 12 for insomnia were retained.

**Table S4.** Mendelian randomization analysis between insomnia and ADHD, ASD or PTSD

| Outcome  | Exposure | Method                           | beta        | se          | p            |
|----------|----------|----------------------------------|-------------|-------------|--------------|
| ADHD     | Insomnia | MR Egger                         | -0.81       | 0.75        | 0.30         |
| ADHD     | Insomnia | Weighted median                  | 0.11        | 0.18        | 0.54         |
| ADHD     | Insomnia | Inverse variance weighted        | 0.26        | 0.22        | 0.24         |
| ADHD     | Insomnia | Simple mode                      | 0.20        | 0.27        | 0.48         |
| ADHD     | Insomnia | MR-PRESSO raw                    | 0.29        | 0.21        | 0.18         |
| ADHD     | Insomnia | MR-PRESSO outlier corrected      | 0.23        | 0.13        | 0.10         |
| Insomnia | ADHD     | MR Egger                         | -0.17       | 0.24        | 0.49         |
| Insomnia | ADHD     | Weighted median                  | 0.02        | 0.04        | 0.56         |
| Insomnia | ADHD     | Inverse variance weighted        | 0.03        | 0.05        | 0.54         |
| Insomnia | ADHD     | Simple mode                      | -0.01       | 0.07        | 0.94         |
| Insomnia | ADHD     | MR-PRESSO raw                    | 0.03        | 0.05        | 0.54         |
| Insomnia | ADHD     | MR-PRESSO outlier corrected      | 0.03        | 0.03        | 0.38         |
| PTSD     | Insomnia | MR Egger                         | -0.41       | 0.43        | 0.35         |
| PTSD     | Insomnia | Weighted median                  | 0.30        | 0.19        | 0.11         |
| PTSD     | Insomnia | <b>Inverse variance weighted</b> | <b>0.41</b> | <b>0.15</b> | <b>0.008</b> |
| PTSD     | Insomnia | Simple mode                      | 0.35        | 0.39        | 0.11         |
| PTSD     | Insomnia | <b>MR-PRESSO raw</b>             | <b>0.44</b> | <b>0.15</b> | <b>0.01</b>  |
| PTSD     | Insomnia | MR-PRESSO outlier corrected      | NA          | NA          | NA           |

Abbreviations: ADHD, attention deficit/hyperactivity disorder; NA, not available; PTSD, post-traumatic stress disorder; se, standard error. Significant results are reported in bold.

**Table S5.** Mendelian randomization analyses between MDD (exposure) and insomnia (outcome) using 70 IVs

| Outcome  | Exposure | Method                             | beta        | se          | <i>p</i>                                |
|----------|----------|------------------------------------|-------------|-------------|-----------------------------------------|
| Insomnia | MDD      | MR Egger                           | 0.20        | 0.25        | 0.42                                    |
| Insomnia | MDD      | <b>Weighted median</b>             | <b>0.26</b> | <b>0.04</b> | <b><math>6.2 \times 10^{-9}</math></b>  |
| Insomnia | MDD      | <b>Inverse variance weighted</b>   | <b>0.31</b> | <b>0.04</b> | <b><math>3.7 \times 10^{-12}</math></b> |
| Insomnia | MDD      | <b>Simple mode</b>                 | <b>0.20</b> | <b>0.09</b> | <b>0.03</b>                             |
| Insomnia | MDD      | <b>MR-PRESSO raw</b>               | <b>0.32</b> | <b>0.04</b> | <b><math>3.2 \times 10^{-10}</math></b> |
| Insomnia | MDD      | <b>MR-PRESSO outlier corrected</b> | <b>0.29</b> | <b>0.04</b> | <b><math>3.5 \times 10^{-11}</math></b> |

This table shows results of the MR analysis between MDD (exposure) and insomnia (outcome). In this analysis, 70 IVs were selected using the top 10,000 variants reported by the MDD GWAS (including data from 23andMe participants) as exposure [7]. No significant horizontal pleiotropy was detected based on the MR Egger intercept ( $p = 0.67$ ). Significant results are reported in bold. Abbreviations: IV, instrumental variable; MDD, major depressive disorder; se, standard error

**Table S6.** Results of mendelian randomization single-SNP tests between MDD (exposure) and insomnia (outcome) using 70 IVs

| SNP         | beta  | se   | <i>p</i>              |
|-------------|-------|------|-----------------------|
| rs1343605   | 1.07  | 0.17 | $2.9 \times 10^{-10}$ |
| rs30266     | 1.09  | 0.18 | $7.1 \times 10^{-10}$ |
| rs3099439   | 0.79  | 0.19 | $2.6 \times 10^{-5}$  |
| rs5995992   | 0.85  | 0.21 | $5.3 \times 10^{-5}$  |
| rs56314503  | 0.93  | 0.23 | $5.5 \times 10^{-5}$  |
| rs2509805   | 0.94  | 0.25 | 0.0001                |
| rs113188507 | 0.94  | 0.25 | 0.0002                |
| rs61990288  | 0.72  | 0.20 | 0.0002                |
| rs10913112  | -0.71 | 0.20 | 0.0003                |
| rs58104186  | 0.75  | 0.22 | 0.0006                |
| rs3823624   | 0.81  | 0.24 | 0.0009                |
| rs8037355   | 0.68  | 0.22 | 0.0019                |
| rs60157091  | 0.79  | 0.25 | 0.0020                |
| rs62188629  | 0.67  | 0.23 | 0.0039                |
| rs6783233   | 0.73  | 0.26 | 0.0052                |
| rs45510091  | 0.69  | 0.25 | 0.0060                |
| rs3213572   | 0.64  | 0.23 | 0.0063                |
| rs35553410  | 0.65  | 0.24 | 0.0064                |
| rs301799    | 0.56  | 0.21 | 0.0071                |
| rs1002656   | 0.45  | 0.21 | 0.0340                |
| rs33431     | -0.55 | 0.27 | 0.0393                |
| rs2568958   | 0.28  | 0.14 | 0.0424                |
| rs7685686   | 0.50  | 0.26 | 0.0492                |
| rs725616    | 0.49  | 0.26 | 0.0603                |
| rs61902811  | 0.38  | 0.21 | 0.0645                |
| rs1890946   | 0.39  | 0.22 | 0.0747                |
| rs9592461   | 0.41  | 0.24 | 0.0785                |
| rs1568452   | 0.36  | 0.21 | 0.0879                |
| rs57344483  | 0.42  | 0.25 | 0.0985                |
| rs7932640   | 0.28  | 0.18 | 0.1249                |
| rs7200826   | 0.32  | 0.21 | 0.1252                |
| rs78337797  | 0.39  | 0.26 | 0.1327                |
| rs1409379   | 0.35  | 0.24 | 0.1497                |
| rs1448938   | 0.33  | 0.24 | 0.1757                |
| rs997934    | 0.35  | 0.26 | 0.1836                |
| rs1095626   | -0.26 | 0.20 | 0.1859                |
| rs7030813   | 0.28  | 0.21 | 0.1882                |
| rs1021363   | 0.23  | 0.18 | 0.1910                |
| rs4346585   | 0.30  | 0.23 | 0.2044                |
| rs10789214  | 0.31  | 0.27 | 0.2444                |
| rs9545360   | 0.27  | 0.25 | 0.2773                |
| rs7241572   | 0.25  | 0.23 | 0.2795                |
| rs1226412   | 0.23  | 0.25 | 0.3580                |
| rs12967855  | 0.19  | 0.21 | 0.3604                |
| rs7837935   | 0.21  | 0.24 | 0.3733                |
| rs7585722   | 0.22  | 0.26 | 0.3966                |

|             |       |      |        |
|-------------|-------|------|--------|
| rs34488670  | 0.20  | 0.25 | 0.4247 |
| rs10817969  | 0.14  | 0.22 | 0.5128 |
| rs1466887   | -0.16 | 0.26 | 0.5495 |
| rs1982277   | -0.11 | 0.22 | 0.6191 |
| rs75581564  | -0.13 | 0.26 | 0.6266 |
| rs3793577   | 0.11  | 0.23 | 0.6313 |
| rs17641524  | 0.09  | 0.20 | 0.6547 |
| rs1045430   | 0.08  | 0.20 | 0.6791 |
| rs7659414   | -0.10 | 0.26 | 0.6835 |
| rs1152578   | -0.09 | 0.24 | 0.6979 |
| rs2043539   | 0.07  | 0.19 | 0.6986 |
| rs200949    | 0.07  | 0.19 | 0.7018 |
| rs59283172  | 0.09  | 0.25 | 0.7169 |
| rs34937911  | 0.10  | 0.27 | 0.7199 |
| rs141954845 | -0.07 | 0.23 | 0.7579 |
| rs143186028 | 0.07  | 0.24 | 0.7655 |
| rs4772087   | -0.06 | 0.23 | 0.7908 |
| rs11135349  | -0.03 | 0.17 | 0.8445 |
| rs56887639  | 0.04  | 0.21 | 0.8625 |
| rs10774600  | -0.04 | 0.26 | 0.8852 |
| rs79924686  | 0.03  | 0.26 | 0.8985 |
| rs198457    | 0.02  | 0.23 | 0.9395 |
| rs11579246  | 0.01  | 0.24 | 0.9557 |
| rs10149470  | 0.00  | 0.19 | 1.0000 |

This table shows results of the MR single-SNP tests between MDD (exposure) and insomnia (outcome). In this analysis, 70 IVs were selected using the top 10,000 variants reported by the MDD GWAS (including data from 23andMe participants) as exposure [7]. Abbreviations: IV, instrumental variable; MDD, major depressive disorder; se, standard error; SNP, single nucleotide polymorphisms



**Table S7.** Mendelian randomization analyses between MDD (exposure) and insomnia (outcome) using 69 IVs

| Outcome  | Exposure | Method                             | beta        | se          | p                                       |
|----------|----------|------------------------------------|-------------|-------------|-----------------------------------------|
| Insomnia | MDD      | MR Egger                           | 0.25        | 0.27        | 0.36                                    |
| Insomnia | MDD      | <b>Weighted median</b>             | <b>0.26</b> | <b>0.05</b> | <b><math>9.7 \times 10^{-9}</math></b>  |
| Insomnia | MDD      | <b>Inverse variance weighted</b>   | <b>0.31</b> | <b>0.05</b> | <b><math>3.8 \times 10^{-12}</math></b> |
| Insomnia | MDD      | <b>Simple mode</b>                 | <b>0.22</b> | <b>0.09</b> | <b>0.02</b>                             |
| Insomnia | MDD      | <b>MR-PRESSO raw</b>               | <b>0.32</b> | <b>0.04</b> | <b><math>3.5 \times 10^{-10}</math></b> |
| Insomnia | MDD      | <b>MR-PRESSO outlier corrected</b> | <b>0.29</b> | <b>0.04</b> | <b><math>3.8 \times 10^{-11}</math></b> |

This table shows results of the MR analysis between MDD (exposure) and insomnia (outcome). In this analysis, IVs were selected using the 102 significant and independent genetic variants reported by the MDD GWAS (including data from 23andMe participants) as exposure [7]. No significant horizontal pleiotropy was detected based on the MR Egger intercept ( $p = 0.81$ ). Significant results are reported in bold. Abbreviations: IV, instrumental variable; MDD, major depressive disorder; se, standard error

**Table S8.** Results of mendelian randomization single-SNP tests between MDD (exposure) and insomnia (outcome) using 69 IVs

| SNP         | beta  | se   | <i>p</i>              |
|-------------|-------|------|-----------------------|
| rs1343605   | 1.07  | 0.17 | $2.9 \times 10^{-10}$ |
| rs30266     | 1.09  | 0.18 | $7.1 \times 10^{-10}$ |
| rs3099439   | 0.79  | 0.19 | $2.6 \times 10^{-5}$  |
| rs5995992   | 0.85  | 0.21 | $5.3 \times 10^{-5}$  |
| rs56314503  | 0.93  | 0.23 | $5.5 \times 10^{-5}$  |
| rs2509805   | 0.94  | 0.25 | 0.0001                |
| rs113188507 | 0.94  | 0.25 | 0.0002                |
| rs61990288  | 0.72  | 0.20 | 0.0002                |
| rs10913112  | -0.71 | 0.20 | 0.0003                |
| rs58104186  | 0.75  | 0.22 | 0.0006                |
| rs3823624   | 0.81  | 0.24 | 0.0009                |
| rs8037355   | 0.68  | 0.22 | 0.0019                |
| rs60157091  | 0.79  | 0.25 | 0.0020                |
| rs62188629  | 0.67  | 0.23 | 0.0039                |
| rs6783233   | 0.73  | 0.26 | 0.0052                |
| rs45510091  | 0.69  | 0.25 | 0.0060                |
| rs3213572   | 0.64  | 0.23 | 0.0063                |
| rs35553410  | 0.65  | 0.24 | 0.0064                |
| rs301799    | 0.56  | 0.21 | 0.0071                |
| rs1002656   | 0.45  | 0.21 | 0.0340                |
| rs33431     | -0.55 | 0.27 | 0.0393                |
| rs2568958   | 0.28  | 0.14 | 0.0424                |
| rs7685686   | 0.50  | 0.26 | 0.0492                |
| rs725616    | 0.49  | 0.26 | 0.0603                |
| rs61902811  | 0.38  | 0.21 | 0.0645                |
| rs1890946   | 0.39  | 0.22 | 0.0747                |
| rs9592461   | 0.41  | 0.24 | 0.0785                |
| rs1568452   | 0.36  | 0.21 | 0.0879                |
| rs57344483  | 0.42  | 0.25 | 0.0985                |
| rs7932640   | 0.28  | 0.18 | 0.1249                |
| rs7200826   | 0.32  | 0.21 | 0.1252                |
| rs78337797  | 0.39  | 0.26 | 0.1327                |
| rs1409379   | 0.35  | 0.24 | 0.1497                |
| rs1448938   | 0.33  | 0.24 | 0.1757                |
| rs997934    | 0.35  | 0.26 | 0.1836                |
| rs1095626   | -0.26 | 0.20 | 0.1859                |
| rs7030813   | 0.28  | 0.21 | 0.1882                |
| rs1021363   | 0.23  | 0.18 | 0.1910                |
| rs4346585   | 0.30  | 0.23 | 0.2044                |
| rs10789214  | 0.31  | 0.27 | 0.2444                |
| rs9545360   | 0.27  | 0.25 | 0.2773                |
| rs7241572   | 0.25  | 0.23 | 0.2795                |
| rs1226412   | 0.23  | 0.25 | 0.3580                |
| rs12967855  | 0.19  | 0.21 | 0.3604                |
| rs7837935   | 0.21  | 0.24 | 0.3733                |
| rs7585722   | 0.22  | 0.26 | 0.3966                |

|             |       |      |        |
|-------------|-------|------|--------|
| rs34488670  | 0.20  | 0.25 | 0.4247 |
| rs10817969  | 0.14  | 0.22 | 0.5128 |
| rs1466887   | -0.16 | 0.26 | 0.5495 |
| rs1982277   | -0.11 | 0.22 | 0.6191 |
| rs75581564  | -0.13 | 0.26 | 0.6266 |
| rs3793577   | 0.11  | 0.23 | 0.6313 |
| rs17641524  | 0.09  | 0.20 | 0.6547 |
| rs1045430   | 0.08  | 0.20 | 0.6791 |
| rs7659414   | -0.10 | 0.26 | 0.6835 |
| rs1152578   | -0.09 | 0.24 | 0.6979 |
| rs2043539   | 0.07  | 0.19 | 0.6986 |
| rs200949    | 0.07  | 0.19 | 0.7018 |
| rs59283172  | 0.09  | 0.25 | 0.7169 |
| rs34937911  | 0.10  | 0.27 | 0.7199 |
| rs141954845 | -0.07 | 0.23 | 0.7579 |
| rs143186028 | 0.07  | 0.24 | 0.7655 |
| rs4772087   | -0.06 | 0.23 | 0.7908 |
| rs11135349  | -0.03 | 0.17 | 0.8445 |
| rs56887639  | 0.04  | 0.21 | 0.8625 |
| rs10774600  | -0.04 | 0.26 | 0.8852 |
| rs198457    | 0.02  | 0.23 | 0.9395 |
| rs11579246  | 0.01  | 0.24 | 0.9557 |
| rs10149470  | 0.00  | 0.19 | 1.0000 |

---

This table shows results of the MR single-SNP tests between MDD (exposure) and insomnia (outcome). In this analysis, 69 IVs were selected using the 102 significant and independent genetic variants reported by the MDD GWAS (including data from 23andMe participants) as exposure [7]. Abbreviations: IV, instrumental variable; MDD, major depressive disorder; se, standard error; SNP, single nucleotide polymorphisms

**Table S9.** Mendelian randomization analyses between insomnia (exposure) and MDD (outcome) using 81 IVs

| Outcome | Exposure | Method                             | beta        | se          | p                                       |
|---------|----------|------------------------------------|-------------|-------------|-----------------------------------------|
| MDD     | Insomnia | MR Egger                           | 0.13        | 0.15        | 0.42                                    |
| MDD     | Insomnia | <b>Weighted median</b>             | <b>0.46</b> | <b>0.04</b> | <b><math>2.0 \times 10^{-32}</math></b> |
| MDD     | Insomnia | <b>Inverse variance weighted</b>   | <b>0.48</b> | <b>0.04</b> | <b><math>3.8 \times 10^{-34}</math></b> |
| MDD     | Insomnia | <b>Simple mode</b>                 | <b>0.49</b> | <b>0.09</b> | <b><math>1.6 \times 10^{-6}</math></b>  |
| MDD     | Insomnia | <b>MR-PRESSO raw</b>               | <b>0.51</b> | <b>0.04</b> | <b><math>1.1 \times 10^{-24}</math></b> |
| MDD     | Insomnia | <b>MR-PRESSO outlier corrected</b> | <b>0.49</b> | <b>0.03</b> | <b><math>4.7 \times 10^{-29}</math></b> |

This table shows results of the MR analysis between MDD (exposure) and insomnia (outcome). In this analysis, 81 IVs were selected using the top 10,000 variants reported by the insomnia GWAS (including data from 23andMe participants) as exposure [33]. During this analysis, significant horizontal pleiotropy was detected based on the MR Egger intercept ( $p = 0.02$ ). However, the association was confirmed to be significant when using the MR-PRESSO outlier corrected method (which applies a correction for horizontal pleiotropy via outlier removal). Consistently, the MR-PRESSO distortion test was not significant ( $p = 0.44$ ) suggesting no significant difference in the causal estimates before and after correction for outliers. Significant results are reported in bold. Abbreviations: IV, instrumental variable; MDD, major depressive disorder; se, standard error

**Table S10.** Results of MR single-SNP tests between insomnia (exposure) and MDD (outcome) using 81 IVs

| SNP        | beta | se   | <i>p</i>              |
|------------|------|------|-----------------------|
| rs2568960  | 1.20 | 0.14 | $4.8 \times 10^{-18}$ |
| rs2431108  | 1.45 | 0.19 | $8.4 \times 10^{-15}$ |
| rs9787523  | 1.30 | 0.21 | $8.4 \times 10^{-10}$ |
| rs2894699  | 1.06 | 0.21 | $2.8 \times 10^{-7}$  |
| rs4955420  | 1.18 | 0.25 | $2.4 \times 10^{-6}$  |
| rs7162423  | 0.91 | 0.20 | $3.3 \times 10^{-6}$  |
| rs1789695  | 1.09 | 0.24 | $5.0 \times 10^{-6}$  |
| rs10896647 | 1.09 | 0.24 | $6.1 \times 10^{-6}$  |
| rs4595203  | 0.75 | 0.17 | $7.5 \times 10^{-6}$  |
| rs11663217 | 0.92 | 0.21 | $1.1 \times 10^{-5}$  |
| rs4304930  | 0.50 | 0.12 | $1.2 \times 10^{-5}$  |
| rs11729015 | 1.06 | 0.25 | $1.7 \times 10^{-5}$  |
| rs1358393  | 0.64 | 0.16 | $3.9 \times 10^{-5}$  |
| rs9317586  | 0.81 | 0.20 | $5.2 \times 10^{-5}$  |
| rs4702     | 0.59 | 0.15 | $5.2 \times 10^{-5}$  |
| rs8076183  | 0.85 | 0.22 | 0.0001                |
| rs39654    | 0.79 | 0.21 | 0.0002                |
| rs10761231 | 0.73 | 0.20 | 0.0003                |
| rs34501189 | 0.83 | 0.23 | 0.0003                |
| rs55728265 | 0.72 | 0.21 | 0.0005                |
| rs3814883  | 0.80 | 0.24 | 0.0007                |
| rs57001955 | 0.63 | 0.19 | 0.0009                |
| rs2122194  | 0.77 | 0.23 | 0.0011                |
| rs12821431 | 0.61 | 0.19 | 0.0011                |
| rs2503185  | 0.73 | 0.23 | 0.0016                |
| rs3732730  | 0.56 | 0.18 | 0.0018                |
| rs10930502 | 0.70 | 0.24 | 0.0036                |
| rs13107325 | 0.55 | 0.19 | 0.0040                |
| rs13037010 | 0.49 | 0.18 | 0.0056                |
| rs4674625  | 0.64 | 0.24 | 0.0065                |
| rs75218827 | 0.58 | 0.22 | 0.0072                |
| rs34877766 | 0.56 | 0.21 | 0.0078                |
| rs12272545 | 0.52 | 0.20 | 0.0083                |
| rs6982265  | 0.63 | 0.24 | 0.0090                |
| rs56182580 | 0.56 | 0.22 | 0.0104                |
| rs4981170  | 0.57 | 0.22 | 0.0109                |
| rs7184998  | 0.47 | 0.19 | 0.0137                |
| rs4664299  | 0.58 | 0.24 | 0.0142                |
| rs10801874 | 0.58 | 0.24 | 0.0148                |
| rs72808262 | 0.52 | 0.23 | 0.0238                |
| rs62530187 | 0.45 | 0.20 | 0.0285                |
| rs1795922  | 0.43 | 0.20 | 0.0345                |
| rs1411751  | 0.47 | 0.22 | 0.0361                |
| rs4383496  | 0.40 | 0.19 | 0.0385                |
| rs34227359 | 0.48 | 0.23 | 0.0393                |
| rs1935884  | 0.30 | 0.15 | 0.0432                |
| rs73034109 | 0.50 | 0.25 | 0.0455                |

|             |       |      |        |
|-------------|-------|------|--------|
| rs75742406  | 0.45  | 0.23 | 0.0525 |
| rs4977893   | 0.45  | 0.23 | 0.0535 |
| rs10947428  | 0.36  | 0.19 | 0.0618 |
| rs1883638   | -0.43 | 0.24 | 0.0758 |
| rs56410336  | 0.40  | 0.23 | 0.0871 |
| rs10494048  | 0.36  | 0.21 | 0.0883 |
| rs12713388  | 0.37  | 0.23 | 0.1066 |
| rs293567    | 0.26  | 0.17 | 0.1125 |
| rs13095140  | -0.31 | 0.20 | 0.1193 |
| rs2344121   | 0.35  | 0.23 | 0.1278 |
| rs1533305   | 0.34  | 0.23 | 0.1363 |
| rs7072776   | 0.36  | 0.25 | 0.1447 |
| rs11897824  | 0.27  | 0.20 | 0.1686 |
| rs10877022  | 0.32  | 0.24 | 0.1848 |
| rs4297935   | 0.26  | 0.21 | 0.2172 |
| rs4799681   | 0.26  | 0.22 | 0.2404 |
| rs7915425   | 0.29  | 0.25 | 0.2458 |
| rs2286729   | 0.24  | 0.20 | 0.2486 |
| rs77176363  | 0.25  | 0.22 | 0.2520 |
| rs9938120   | 0.25  | 0.22 | 0.2521 |
| rs35681248  | 0.24  | 0.21 | 0.2558 |
| rs1064213   | 0.20  | 0.21 | 0.3287 |
| rs9889282   | 0.19  | 0.21 | 0.3754 |
| rs463245    | 0.20  | 0.25 | 0.4133 |
| rs2664299   | -0.19 | 0.24 | 0.4263 |
| rs1349490   | -0.18 | 0.23 | 0.4291 |
| rs118166957 | 0.15  | 0.19 | 0.4456 |
| rs12684080  | 0.14  | 0.19 | 0.4665 |
| rs1823125   | 0.09  | 0.15 | 0.5383 |
| rs1846644   | 0.12  | 0.20 | 0.5546 |
| rs62144054  | -0.07 | 0.13 | 0.5664 |
| rs12927162  | 0.08  | 0.18 | 0.6388 |
| rs2718777   | 0.06  | 0.23 | 0.8069 |
| rs72807818  | -0.01 | 0.21 | 0.9620 |

This table shows results of the MR single-SNP tests between MDD (exposure) and insomnia (outcome). In this analysis, 81 IVs were selected using the top 10,000 variants reported by the insomnia GWAS (including data from 23andMe participants) as exposure [33]. Abbreviations: IV, instrumental variable; MDD, major depressive disorder; se, standard error; SNP, single nucleotide polymorphisms

**Table S11.** Mendelian randomization analyses between insomnia (exposure) and MDD (outcome) using 223 IVs

| Outcome | Exposure | Method                             | beta        | se          | <i>p</i>                                |
|---------|----------|------------------------------------|-------------|-------------|-----------------------------------------|
| MDD     | Insomnia | <b>MR Egger</b>                    | <b>0.74</b> | <b>0.24</b> | <b>0.002</b>                            |
| MDD     | Insomnia | <b>Weighted median</b>             | <b>1.17</b> | <b>0.07</b> | <b><math>4.2 \times 10^{-57}</math></b> |
| MDD     | Insomnia | <b>Inverse variance weighted</b>   | <b>1.24</b> | <b>0.07</b> | <b><math>2.5 \times 10^{-71}</math></b> |
| MDD     | Insomnia | <b>Simple mode</b>                 | <b>1.12</b> | <b>0.21</b> | <b><math>4.6 \times 10^{-7}</math></b>  |
| MDD     | Insomnia | <b>MR-PRESSO raw</b>               | <b>1.28</b> | <b>0.07</b> | <b><math>5.5 \times 10^{-52}</math></b> |
| MDD     | Insomnia | <b>MR-PRESSO outlier corrected</b> | <b>1.25</b> | <b>0.06</b> | <b><math>1.1 \times 10^{-55}</math></b> |

This table shows results of the MR analysis between MDD (exposure) and insomnia (outcome). In this analysis, 223 IVs were selected using the top 554 independent genetic variants reported by the insomnia GWAS (including data from 23andMe participants) as exposure [33]. During this analysis, significant horizontal pleiotropy was detected based on the MR Egger intercept ( $p = 0.03$ ). However, the association was confirmed to be significant when using the MR-PRESSO outlier corrected method (which applies a correction for horizontal pleiotropy via outlier removal). Consistently, the MR-PRESSO distortion test was not significant ( $p = 0.60$ ), suggesting no significant difference in the causal estimates before and after correction for outliers. Significant results are reported in bold. Abbreviations: IV, instrumental variable; MDD, major depressive disorder; se, standard error

**Table S12.** Results of MR single-SNP tests between insomnia (exposure) and MDD (outcome) using 223 IVs

| SNP        | beta | se   | <i>p</i>              |
|------------|------|------|-----------------------|
| rs2568960  | 3.18 | 0.37 | $4.8 \times 10^{-18}$ |
| rs2431108  | 3.25 | 0.42 | $8.4 \times 10^{-15}$ |
| rs9787523  | 3.38 | 0.55 | $8.4 \times 10^{-10}$ |
| rs12790660 | 2.91 | 0.58 | $4.1 \times 10^{-7}$  |
| rs516890   | 3.65 | 0.73 | $6.4 \times 10^{-7}$  |
| rs218985   | 3.27 | 0.67 | $1.1 \times 10^{-6}$  |
| rs7162423  | 2.22 | 0.48 | $3.3 \times 10^{-6}$  |
| rs10842059 | 4.16 | 0.90 | $3.8 \times 10^{-6}$  |
| rs1789695  | 2.63 | 0.58 | $5.0 \times 10^{-6}$  |
| rs4595203  | 2.04 | 0.45 | $7.5 \times 10^{-6}$  |
| rs4831647  | 3.78 | 0.86 | $1.1 \times 10^{-5}$  |
| rs9543859  | 3.22 | 0.73 | $1.1 \times 10^{-5}$  |
| rs4304930  | 1.25 | 0.29 | $1.2 \times 10^{-5}$  |
| rs1820514  | 3.72 | 0.86 | $1.5 \times 10^{-5}$  |
| rs11729015 | 3.15 | 0.73 | $1.7 \times 10^{-5}$  |
| rs8766     | 2.08 | 0.49 | $2.1 \times 10^{-5}$  |
| rs314281   | 2.26 | 0.54 | $2.6 \times 10^{-5}$  |
| rs6786798  | 3.20 | 0.77 | $3.0 \times 10^{-5}$  |
| rs1358393  | 1.77 | 0.43 | $3.9 \times 10^{-5}$  |
| rs8084405  | 3.76 | 0.92 | $4.4 \times 10^{-5}$  |
| rs9317586  | 2.18 | 0.54 | $5.2 \times 10^{-5}$  |
| rs4702     | 1.62 | 0.40 | $5.2 \times 10^{-5}$  |
| rs12617557 | 2.69 | 0.67 | $6.3 \times 10^{-5}$  |
| rs7619638  | 2.64 | 0.67 | $7.4 \times 10^{-5}$  |
| rs2003273  | 3.03 | 0.77 | $7.6 \times 10^{-5}$  |
| rs240110   | 2.41 | 0.61 | $8.5 \times 10^{-5}$  |
| rs10035289 | 2.10 | 0.54 | $9.3 \times 10^{-5}$  |
| rs12580149 | 2.63 | 0.68 | 0.0001                |
| rs8076183  | 2.43 | 0.63 | 0.0001                |
| rs790316   | 2.75 | 0.72 | 0.0001                |
| rs10104523 | 2.30 | 0.61 | 0.0002                |
| rs694786   | 2.01 | 0.54 | 0.0002                |
| rs11765062 | 3.20 | 0.86 | 0.0002                |
| rs10992756 | 1.82 | 0.50 | 0.0003                |
| rs12605642 | 1.94 | 0.54 | 0.0003                |
| rs10927078 | 2.56 | 0.71 | 0.0003                |
| rs4906347  | 2.06 | 0.58 | 0.0003                |
| rs6661750  | 2.20 | 0.61 | 0.0003                |
| rs76924513 | 2.50 | 0.70 | 0.0004                |
| rs1552514  | 2.81 | 0.80 | 0.0004                |
| rs45510091 | 2.55 | 0.73 | 0.0005                |
| rs12598089 | 2.98 | 0.86 | 0.0005                |
| rs2123641  | 2.68 | 0.78 | 0.0006                |
| rs910187   | 1.89 | 0.55 | 0.0006                |
| rs9815484  | 1.60 | 0.47 | 0.0006                |
| rs3814883  | 2.07 | 0.61 | 0.0007                |
| rs2581458  | 2.64 | 0.80 | 0.0010                |



|            |       |      |        |
|------------|-------|------|--------|
| rs11954162 | 1.93  | 0.59 | 0.0011 |
| rs1806152  | 2.28  | 0.70 | 0.0012 |
| rs61979497 | 2.98  | 0.92 | 0.0012 |
| rs4409363  | 2.84  | 0.88 | 0.0012 |
| rs3733421  | 2.72  | 0.88 | 0.0020 |
| rs7173565  | 1.68  | 0.54 | 0.0021 |
| rs776935   | 1.88  | 0.61 | 0.0021 |
| rs67588220 | 1.56  | 0.52 | 0.0027 |
| rs4858241  | 2.22  | 0.75 | 0.0031 |
| rs2616192  | 2.25  | 0.77 | 0.0033 |
| rs10930502 | 1.96  | 0.67 | 0.0036 |
| rs13107325 | 1.42  | 0.49 | 0.0040 |
| rs7133378  | 1.87  | 0.66 | 0.0044 |
| rs12618343 | 2.03  | 0.71 | 0.0045 |
| rs579448   | 2.02  | 0.72 | 0.0049 |
| rs62178707 | 1.73  | 0.61 | 0.0049 |
| rs12311881 | 2.46  | 0.88 | 0.0052 |
| rs13037010 | 1.41  | 0.51 | 0.0056 |
| rs11984380 | 1.97  | 0.72 | 0.0061 |
| rs1864896  | 1.98  | 0.73 | 0.0068 |
| rs75218827 | 1.65  | 0.61 | 0.0072 |
| rs12137221 | 2.32  | 0.87 | 0.0075 |
| rs3755831  | 1.46  | 0.55 | 0.0078 |
| rs12272545 | 1.32  | 0.50 | 0.0083 |
| rs4912844  | -1.94 | 0.74 | 0.0089 |
| rs76901635 | 1.98  | 0.76 | 0.0096 |
| rs11165657 | 1.70  | 0.66 | 0.0103 |
| rs56182580 | 1.37  | 0.53 | 0.0104 |
| rs4981170  | 1.40  | 0.55 | 0.0109 |
| rs11724690 | 2.03  | 0.80 | 0.0110 |
| rs503460   | 1.49  | 0.59 | 0.0113 |
| rs7184998  | 1.18  | 0.48 | 0.0137 |
| rs585522   | 1.16  | 0.47 | 0.0138 |
| rs13001483 | 1.68  | 0.70 | 0.0167 |
| rs8110135  | 1.95  | 0.82 | 0.0170 |
| rs10837042 | 1.49  | 0.63 | 0.0181 |
| rs8036386  | 1.44  | 0.63 | 0.0217 |
| rs7551881  | 1.70  | 0.75 | 0.0234 |
| rs10400508 | 1.98  | 0.88 | 0.0244 |
| rs6533604  | 1.87  | 0.85 | 0.0281 |
| rs62530187 | 1.27  | 0.58 | 0.0285 |
| rs9509284  | 1.37  | 0.63 | 0.0291 |
| rs12023901 | 1.77  | 0.81 | 0.0294 |
| rs2884836  | 1.67  | 0.77 | 0.0297 |
| rs4455151  | 1.70  | 0.78 | 0.0300 |
| rs11903069 | 1.62  | 0.77 | 0.0350 |
| rs1411751  | 1.21  | 0.58 | 0.0361 |
| rs2158414  | 1.57  | 0.75 | 0.0367 |
| rs10517119 | 1.92  | 0.92 | 0.0369 |

|             |       |      |        |
|-------------|-------|------|--------|
| rs4383496   | 0.99  | 0.48 | 0.0385 |
| rs7708900   | 1.48  | 0.72 | 0.0385 |
| rs797091    | 1.67  | 0.81 | 0.0401 |
| rs1549577   | 1.28  | 0.63 | 0.0414 |
| rs4681358   | 1.45  | 0.72 | 0.0430 |
| rs7844069   | 1.48  | 0.73 | 0.0431 |
| rs2356265   | 1.44  | 0.71 | 0.0434 |
| rs73034109  | 1.16  | 0.58 | 0.0455 |
| rs2418884   | 0.80  | 0.41 | 0.0505 |
| rs11807834  | 1.39  | 0.71 | 0.0524 |
| rs75742406  | 1.19  | 0.61 | 0.0525 |
| rs2016475   | 1.33  | 0.69 | 0.0527 |
| rs10947428  | 0.83  | 0.44 | 0.0618 |
| rs11077334  | 1.64  | 0.88 | 0.0624 |
| rs10148610  | 1.32  | 0.73 | 0.0726 |
| rs9325358   | 0.88  | 0.49 | 0.0726 |
| rs6812227   | 1.24  | 0.70 | 0.0758 |
| rs9936879   | 1.01  | 0.58 | 0.0783 |
| rs17836224  | -1.28 | 0.73 | 0.0801 |
| rs6878050   | -1.40 | 0.80 | 0.0801 |
| rs62429521  | -1.33 | 0.76 | 0.0823 |
| rs12983032  | -1.10 | 0.64 | 0.0871 |
| rs6864168   | 1.46  | 0.86 | 0.0896 |
| rs2232839   | 1.30  | 0.77 | 0.0920 |
| rs10368     | 1.42  | 0.85 | 0.0956 |
| rs62396748  | 1.01  | 0.61 | 0.0987 |
| rs145664840 | 1.19  | 0.72 | 0.0997 |
| rs17416209  | 1.19  | 0.74 | 0.1074 |
| rs293567    | 0.66  | 0.42 | 0.1125 |
| rs75869405  | 1.19  | 0.75 | 0.1126 |
| rs2544211   | 1.13  | 0.72 | 0.1138 |
| rs566903    | 1.18  | 0.75 | 0.1146 |
| rs13095140  | -0.81 | 0.52 | 0.1193 |
| rs13269117  | 1.17  | 0.75 | 0.1198 |
| rs2344121   | 0.96  | 0.63 | 0.1278 |
| rs593839    | 1.12  | 0.73 | 0.1278 |
| rs11173201  | 1.04  | 0.70 | 0.1363 |
| rs9943753   | 0.96  | 0.64 | 0.1365 |
| rs111296206 | 1.18  | 0.79 | 0.1374 |
| rs834233    | 1.10  | 0.75 | 0.1425 |
| rs8069356   | 1.17  | 0.80 | 0.1447 |
| rs12677105  | 1.12  | 0.77 | 0.1452 |
| rs8076005   | 1.10  | 0.77 | 0.1539 |
| rs669245    | -1.24 | 0.88 | 0.1588 |
| rs11897824  | 0.82  | 0.59 | 0.1686 |
| rs8063871   | 1.10  | 0.80 | 0.1691 |
| rs6965799   | -0.98 | 0.72 | 0.1700 |
| rs879483    | 1.18  | 0.86 | 0.1700 |
| rs1416901   | 0.79  | 0.58 | 0.1708 |

|             |       |      |        |
|-------------|-------|------|--------|
| rs62442231  | 1.20  | 0.90 | 0.1824 |
| rs4454035   | 0.97  | 0.73 | 0.1874 |
| rs2271731   | -1.02 | 0.78 | 0.1943 |
| rs8054082   | 0.67  | 0.53 | 0.2041 |
| rs3815156   | 0.86  | 0.71 | 0.2261 |
| rs1007841   | 1.06  | 0.90 | 0.2389 |
| rs6504568   | 1.02  | 0.87 | 0.2408 |
| rs7915425   | 0.81  | 0.70 | 0.2458 |
| rs2286729   | 0.64  | 0.56 | 0.2486 |
| rs62472321  | 0.76  | 0.66 | 0.2500 |
| rs77176363  | 0.70  | 0.61 | 0.2520 |
| rs61788417  | 0.88  | 0.77 | 0.2522 |
| rs35681248  | 0.58  | 0.51 | 0.2558 |
| rs1383890   | 0.96  | 0.86 | 0.2643 |
| rs9315688   | 0.80  | 0.73 | 0.2753 |
| rs6019663   | 0.73  | 0.67 | 0.2779 |
| rs11135493  | 0.73  | 0.70 | 0.2948 |
| rs2184796   | -0.92 | 0.88 | 0.2958 |
| rs7853585   | -0.72 | 0.69 | 0.2967 |
| rs1064213   | 0.53  | 0.54 | 0.3287 |
| rs112358407 | 0.84  | 0.88 | 0.3383 |
| rs16895508  | 0.64  | 0.68 | 0.3417 |
| rs12647020  | 0.88  | 0.94 | 0.3492 |
| rs11980428  | 0.67  | 0.74 | 0.3705 |
| rs57314044  | 0.59  | 0.66 | 0.3752 |
| rs136310    | 0.78  | 0.88 | 0.3754 |
| rs2615252   | 0.65  | 0.73 | 0.3754 |
| rs9889282   | 0.49  | 0.55 | 0.3754 |
| rs9971199   | 0.70  | 0.80 | 0.3816 |
| rs35659126  | -0.67 | 0.77 | 0.3841 |
| rs1331156   | 0.66  | 0.76 | 0.3854 |
| rs17727688  | 0.65  | 0.75 | 0.3861 |
| rs12973258  | 0.67  | 0.79 | 0.3928 |
| rs1397844   | 0.67  | 0.79 | 0.3928 |
| rs79637296  | 0.71  | 0.84 | 0.3967 |
| rs2861752   | 0.51  | 0.61 | 0.4025 |
| rs463245    | 0.60  | 0.73 | 0.4133 |
| rs10110224  | 0.70  | 0.86 | 0.4157 |
| rs2664299   | -0.50 | 0.63 | 0.4263 |
| rs703848    | 0.46  | 0.59 | 0.4311 |
| rs72899452  | 0.56  | 0.73 | 0.4412 |
| rs118166957 | 0.38  | 0.49 | 0.4456 |
| rs56324203  | 0.68  | 0.92 | 0.4598 |
| rs9607581   | 0.49  | 0.68 | 0.4702 |
| rs13093657  | -0.57 | 0.82 | 0.4878 |
| rs615526    | 0.52  | 0.77 | 0.5004 |
| rs10906391  | -0.52 | 0.82 | 0.5270 |
| rs34971686  | -0.48 | 0.78 | 0.5390 |
| rs4653743   | 0.50  | 0.82 | 0.5404 |

|            |       |      |        |
|------------|-------|------|--------|
| rs12684650 | 0.35  | 0.59 | 0.5513 |
| rs6471065  | 0.46  | 0.77 | 0.5535 |
| rs62158170 | 0.22  | 0.38 | 0.5586 |
| rs4402784  | 0.37  | 0.68 | 0.5916 |
| rs62144053 | -0.16 | 0.30 | 0.5938 |
| rs78154941 | 0.37  | 0.70 | 0.6004 |
| rs2065677  | 0.45  | 0.87 | 0.6036 |
| rs1536053  | 0.40  | 0.78 | 0.6096 |
| rs77276698 | -0.28 | 0.56 | 0.6171 |
| rs78531597 | -0.44 | 0.89 | 0.6220 |
| rs2236202  | 0.34  | 0.71 | 0.6312 |
| rs12927162 | 0.23  | 0.49 | 0.6388 |
| rs823248   | 0.30  | 0.72 | 0.6755 |
| rs7657954  | 0.32  | 0.80 | 0.6922 |
| rs12814145 | 0.28  | 0.75 | 0.7056 |
| rs4803217  | 0.28  | 0.78 | 0.7176 |
| rs62383290 | 0.27  | 0.84 | 0.7522 |
| rs11956866 | 0.22  | 0.72 | 0.7624 |
| rs10927840 | 0.23  | 0.83 | 0.7795 |
| rs528964   | -0.22 | 0.85 | 0.7988 |
| rs58475265 | -0.17 | 0.66 | 0.7993 |
| rs34772727 | -0.16 | 0.76 | 0.8346 |
| rs62444044 | 0.17  | 0.86 | 0.8415 |
| rs11871043 | -0.10 | 0.55 | 0.8557 |
| rs6872919  | 0.10  | 0.72 | 0.8890 |
| rs34517439 | -0.08 | 0.61 | 0.8931 |
| rs429358   | 0.06  | 0.69 | 0.9357 |
| rs72807818 | -0.03 | 0.53 | 0.9620 |
| rs7805564  | 0.03  | 0.83 | 0.9758 |

This table shows results of the MR single-SNP tests between MDD (exposure) and insomnia (outcome). In this analysis, 223 IVs were selected using the top 554 independent genetic variants reported by the insomnia GWAS (including data from 23andMe participants) as exposure [33]

Abbreviations: IV, instrumental variable; MDD, major depressive disorder; se, standard error; SNP, single nucleotide polymorphisms
